# Supplementary material
Source: PubMed Central journal article supplement (PMC6939614)
Supplement: NIHMS1065371-supplement-Supporting_Figures.pdf [file NIHMS1065371-supplement-Supporting_Figures.pdf]

**Online Supporting Information for**

**“A Targeted Quantitative Proteomic Approach for High-throughput  
Quantitative Profiling of Small GTPases in Brain Tissues of Alzheimer’s  
Disease Patients”**

Ming Huang<sup>†</sup>, Martin Darvas<sup>‡</sup>, C. Dirk Keene<sup>‡</sup> and Yinsheng Wang<sup>†,\*</sup>

<sup>†</sup>Environmental Toxicology Graduate Program and Department of Chemistry, University of  
California, Riverside, CA92521

<sup>‡</sup>Department of Pathology, University of Washington, Seattle, WA98104

\*To whom correspondence should be addressed. Email: yinsheng@ucr.edu.

## **Table of Contents:**

### **I. Supplementary Experimental Section**

### **II. Supplementary Tables**

- i. **Table S1A.** A detailed list of target proteins, peptides, MRM transitions and collision energies.
- ii. **Table S1B.** A detailed list of peptide quantification results obtained from the scheduled LC-MRM analysis (in Excel).
- iii. **Table S1C.** A detailed list of protein quantification results obtained from the scheduled LC-MRM analysis (in Excel).
- iv. **Table S2.** A list of RAB GTPases involved with synaptic trafficking reported in literature.

### **III. Supplementary Figures**

- i. **Figure S1.** MRM analysis for the confirmation of the qualities of the crude stable isotope-labeled (SIL) peptides.
- ii. **Figure S2.** Coverage, dynamic range and optimization of spike-in concentration for the crude SIL peptides in the MRM analyses.
- iii. **Figure S3.** Extracted ion chromatograms (XICs) showing selected MRM traces for optimization of spiked-in concentrations of crude SIL peptides.
- iv. **Figure S4.** Selection for the twelve surrogate standard (SS) peptides across the designated retention time windows.
- v. **Figure S5.** Comparison of the relative peak areas extracted for the selected SS peptides in the MRM analyses across similar or different retention time windows.
- vi. **Figure S6.** XICs showing selected MRM traces for quantification of various RAB3 isoforms (RAB3A, RAB3B, RAB3C and RAB3D)
- vii. **Figure S7.** Quantification details for RAB27B by two normalization methods.

### **IV. Supplementary Skyline Files**

The Skyline files for the MRM spectral library containing the MS/MS and iRT information for all targeted small GTPase peptides and 10 standard BSA peptides are available at PeptideAtlas with the identifier number of PASS01380 (<http://www.peptideatlas.org/PASS/PASS01380>).

## I. Supplementary Experimental Section

**Heavy isotope-labeled synthetic peptides.** Crude synthetic peptides labeled with  $^{13}\text{C}/^{15}\text{N}$  on C-terminal lysine and arginine (~75% in peptide purity and >99% in isotopic purity) were synthesized and purified by New England Peptides (Cambridge, MA) in 96-well plate format. According to vendor's documentation, the average purity of a 15-mer peptide is ~75% with Tier Two Analysis (mass spectrum of every peptide) provided. The lyophilized form of peptides was reconstituted with 15% acetonitrile in 0.1% formic acid, aliquoted and stored at -80 °C until use to avoid freeze/thaw cycles. The crude heavy peptide standards of small GTPases were added to each sample at nominal concentrations of 0.5, 2, and 5 fmol/ $\mu\text{L}$ , respectively.

These peptide standards were used as received from the vendor without further purification, as, for relative quantification as employed in this study, all data points are normalized to a reference setting, thereby eliminating the peptide concentration as a variable.

**Immunoblotting.** After tissue homogenization, the protein concentration in the total brain tissue lysates was determined using Quick Start Bradford Protein Assay (Bio-Rad). Approximately 10  $\mu\text{g}$  of lysates were mixed with 4 $\times$  Laemmli SDS loading buffer, boiled at 95 °C for 5 min, and loaded onto 10% polyacrylamide gels. After electrophoresis, the proteins were transferred onto nitrocellulose membranes. After blocking with 5% non-fat milk in PBS with 0.1% Tween-20 (PBST) at 25 °C for 1 h, the membranes were incubated with primary antibodies against human RAB27B (Proteintech; rabbit polyclonal, 1:2,000) or  $\beta$ -actin (Thermo Fisher; rabbit polyclonal, 1:10,000). After overnight incubation with primary antibodies at 4°C with 5% bovine serum albumin (BSA) in PBST, the membranes were then incubated with peroxidase-labeled donkey

anti-rabbit secondary antibody (Thermo Fisher; 1:10,000) for 1 h at 25 °C. Amersham ECL Prime Western Blot Detecting Reagent (GE Healthcare) was used for visualization of protein bands.

## II. Supplementary Tables

**Table S1.** A complete list of all small GTPases quantified in the scheduled LC-MRM analyses.

**Table S2.** A list of RAB GTPases involved with synaptic trafficking reported in literature.

| Pavlos <i>et al.</i> (2010) <sup>1</sup>                                                                                                                                                                                            | Kokotos <i>et al.</i> (2018) <sup>2</sup>                                                                                                                      | Mignogna <i>et al.</i> (2018) <sup>3</sup>                                                                                                                                                                                                |
|-------------------------------------------------------------------------------------------------------------------------------------------------------------------------------------------------------------------------------------|----------------------------------------------------------------------------------------------------------------------------------------------------------------|-------------------------------------------------------------------------------------------------------------------------------------------------------------------------------------------------------------------------------------------|
| RAB1A, RAB2A, RAB2B,<br>RAB3A, RAB3B, RAB3C,<br>RAB4A, RAB4B, RAB5A,<br>RAB5B, RAB5C, RAB6A,<br>RAB6B, RAB7A, RAB8B,<br>RAB10, RAB11B, RAB12,<br>RAB14, RAB15, RAB18,<br>RAB21, RAB26, RAB27B,<br>RAB33B, RAB34/39,<br>RAB35, RAB43 | RAB1A, RAB2A, RAB3A,<br>RAB3B, RAB3C, RAB45,<br>RAB5A, RAB5B, RAB5C,<br>RAB6A, RAB6B, RAB7A,<br>RAB10, RAB11A, RAB14,<br>RAB18, RAB21, RAB23,<br>RAB33A, RAB35 | Cell body:<br>RAB1, RAB2, RAB6, RAB7,<br>RAB8, RAB33B, RAB39B<br><br>Axon:<br>RAB4, RAB5, RAB7, RAB8,<br>RAB10, RAB11, RAB13,<br>RAB14, RAB25, RAB26,<br>RAB27B, RAB33A, RAB35<br><br>Dendrite:<br>RAB8, RAB10, RAB11,<br>RAB17,<br>RAB21 |
| 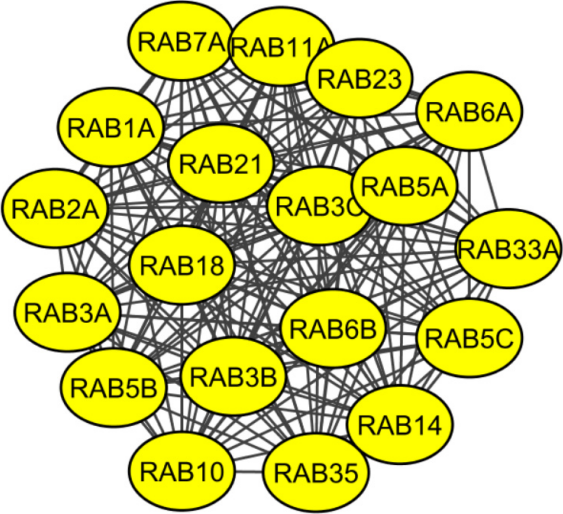                                                                                                                                                |                                                                                                                                                                |                                                                                                                                                                                                                                           |

## Supplementary Figures

**Figure S1. MRM analysis for the confirmation of the qualities of the crude stable isotope-labeled (SIL) peptides, i.e. lack of contamination of light version of the corresponding peptides.**

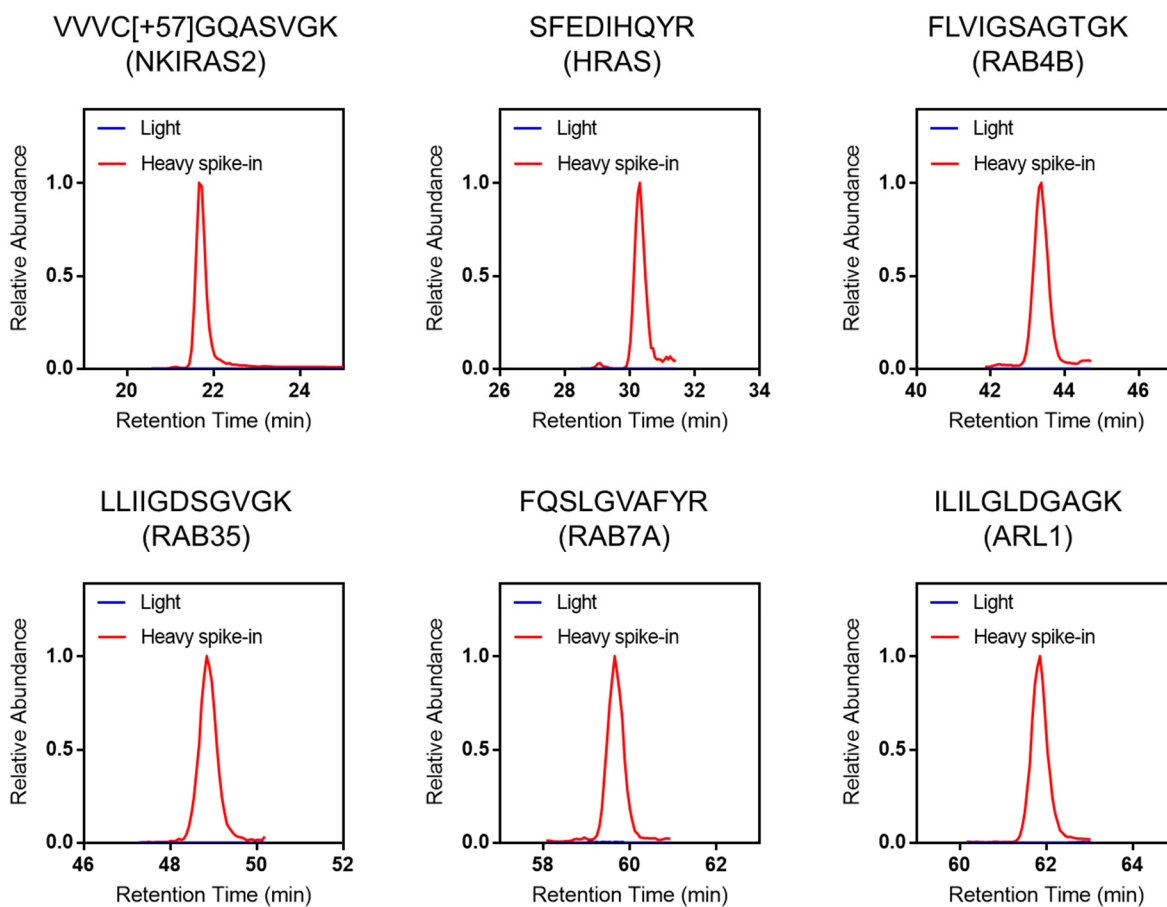

**Figure S2. Coverage, dynamic range and optimization of spike-in concentration for the crude SIL peptides in the MRM analyses.** (A) A Venn diagram showing the coverage of the SIL peptides detected in a single LC-MRM run; (B) A scatter plot depicting the distribution of peak areas resulting from LC-MRM analysis of 2 fmol each of crude SIL peptides; (C) A table describing the peak area ratios (light/heavy) obtained from three LC-MRM experiments.

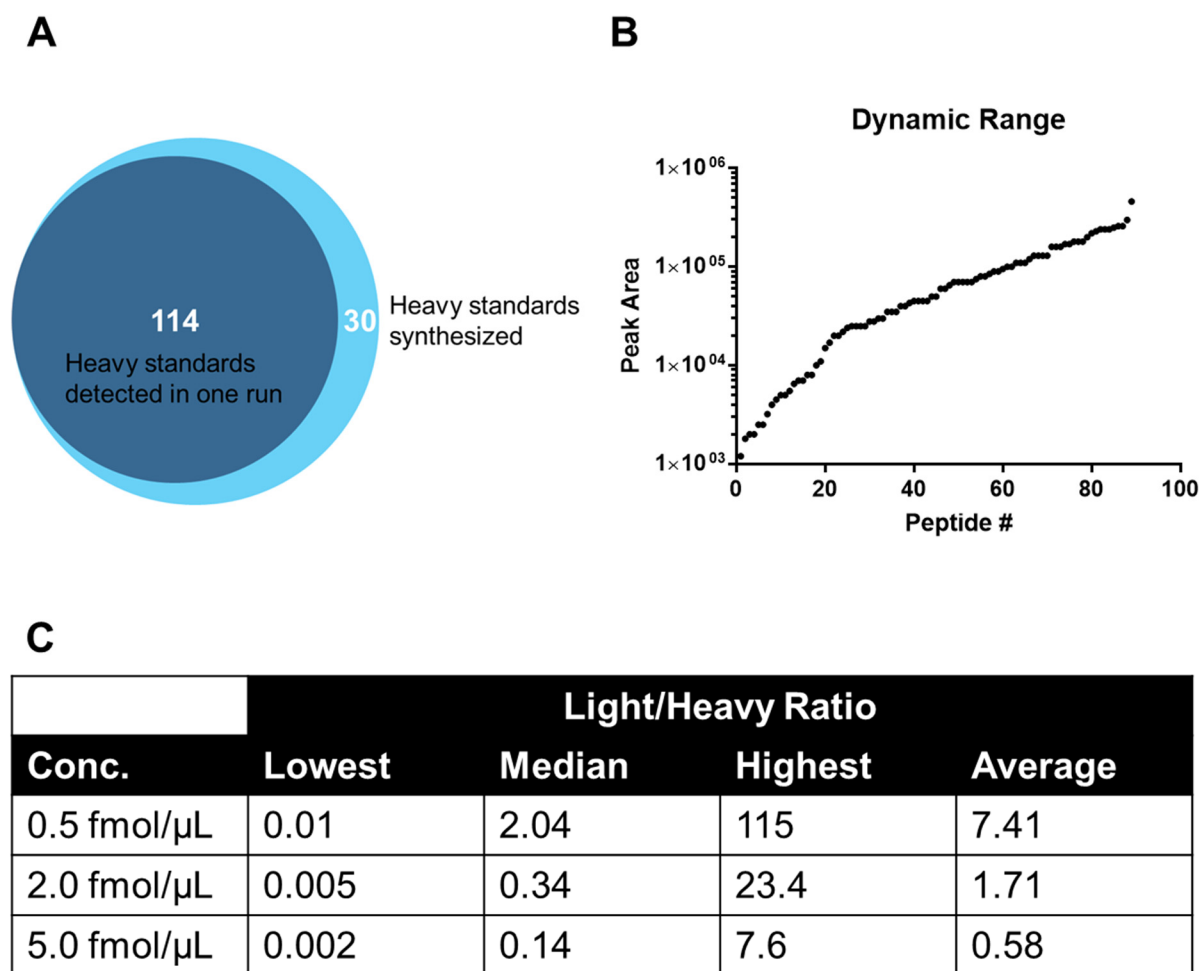

**Figure S3. Extracted-ion chromatograms (XICs) showing selected MRM traces for the optimization of spiked-in concentrations of crude SIL peptides.**

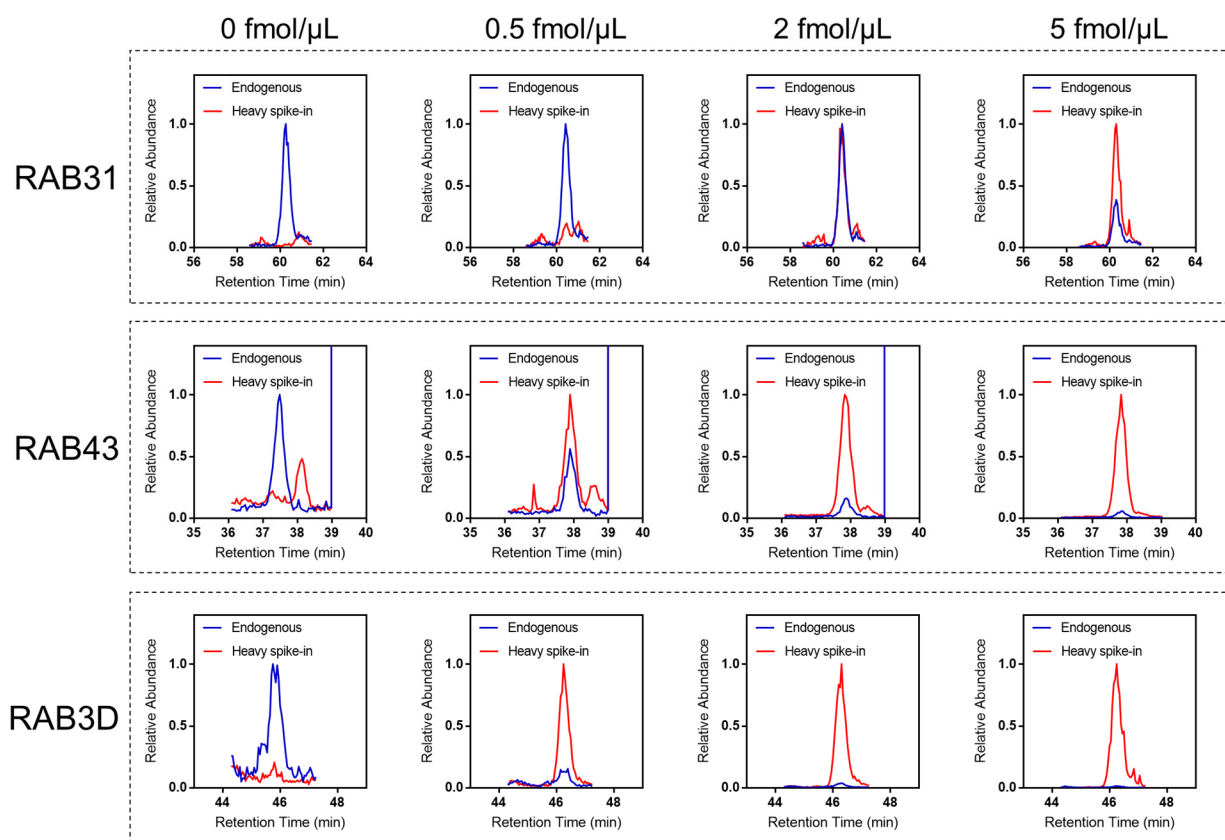

**Figure S4. Selection for the twelve surrogate standard (SS) peptides across the designated chromatographic retention time windows.**

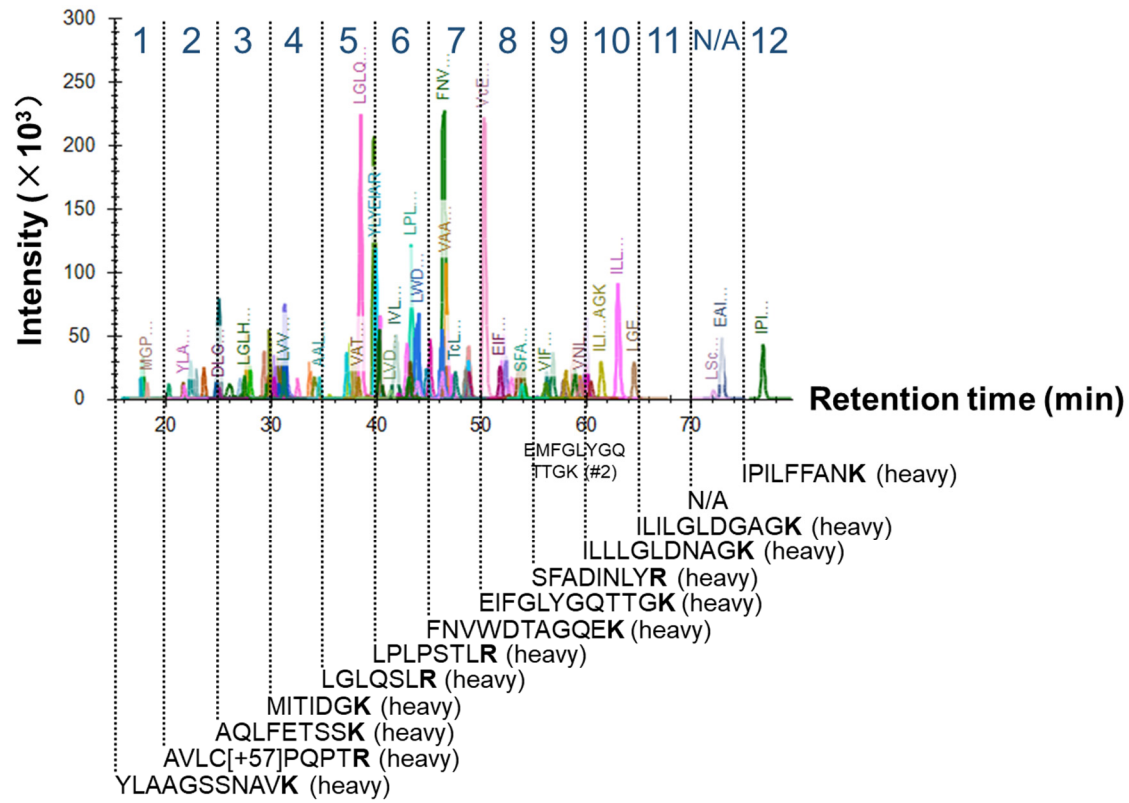

**Figure S5. Comparison of the relative peak areas extracted for the selected SS peptides in the MRM analyses across similar or different retention time windows. (A)** A connected scatter plot illustrating the relative peak area variations across three SS peptides (#1, #2, #3) eluted at similar retention time windows; **(B)** A connected scatter plot illustrating the relative peak area variations across three SS peptides (#1, #7, #12) eluted at different retention time windows.

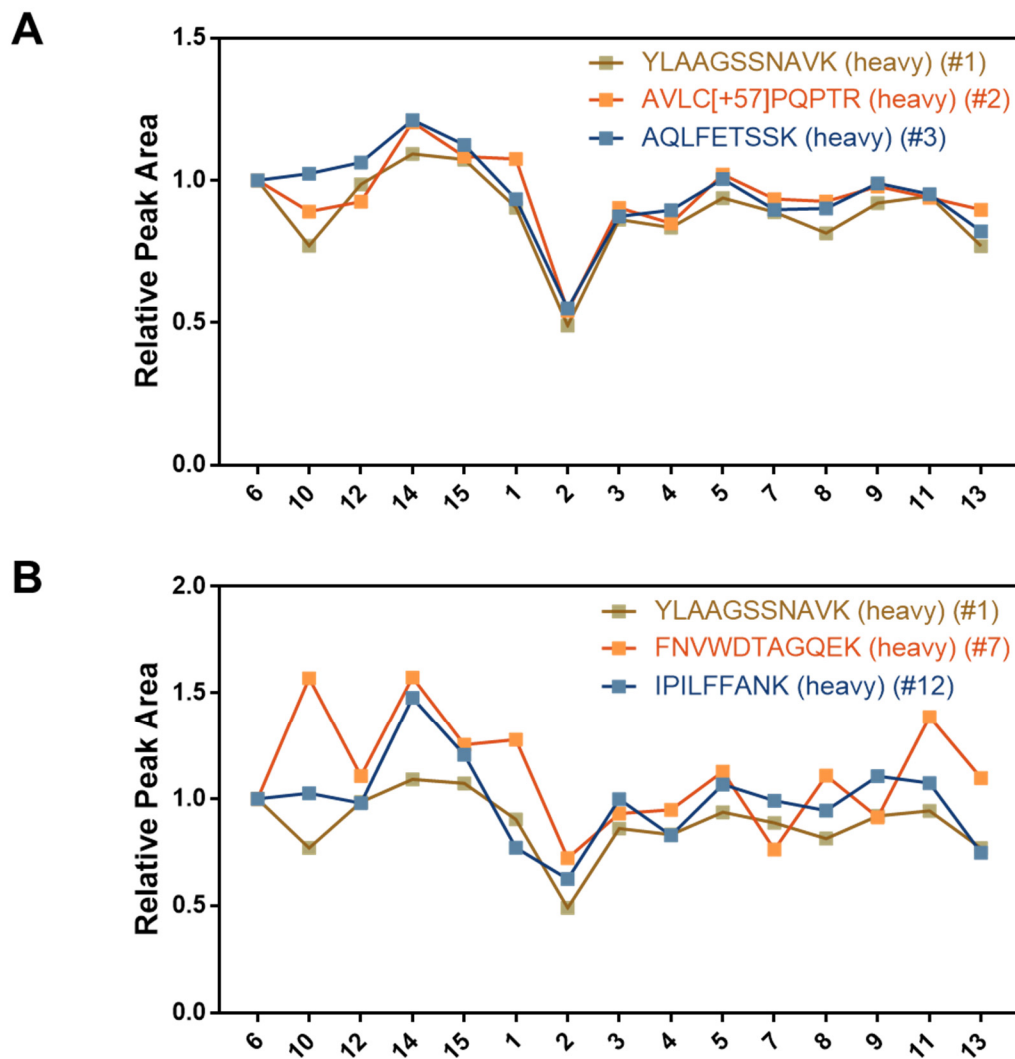

**Figure S6. XICs showing selected MRM traces for quantification of various RAB3 isoforms (RAB3A, RAB3B, RAB3C and RAB3D)**

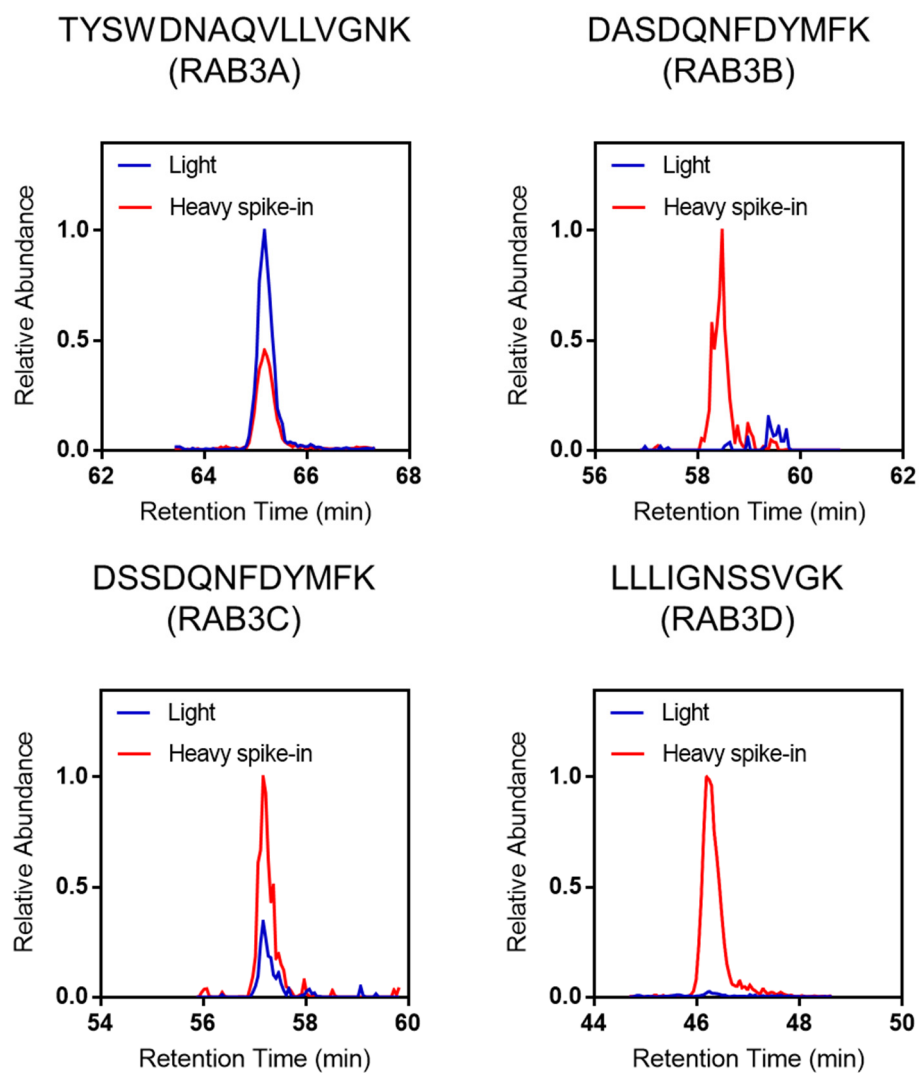

**Figure S7. Quantification details for RAB27B by two normalization methods. (A)** The relative contribution of each transition to targeted MRM analysis of the endogenous LLALGDSGVGK peptide derived from RAB27B; **(B)** The relative contribution of each transition to targeted MRM analysis of the isotope-labeled LLALGDSGVGK peptide; **(C)** The relative contribution of each transition to targeted MRM analysis of the endogenous FITTVGIDFR peptide; **(D)** Bar charts showing the quantification results normalized from IS peptide (LLALGDSGVGK) and SS peptide (FITTVGIDFR); **(E)** Linear regression of the quantification results shown in panel (D).

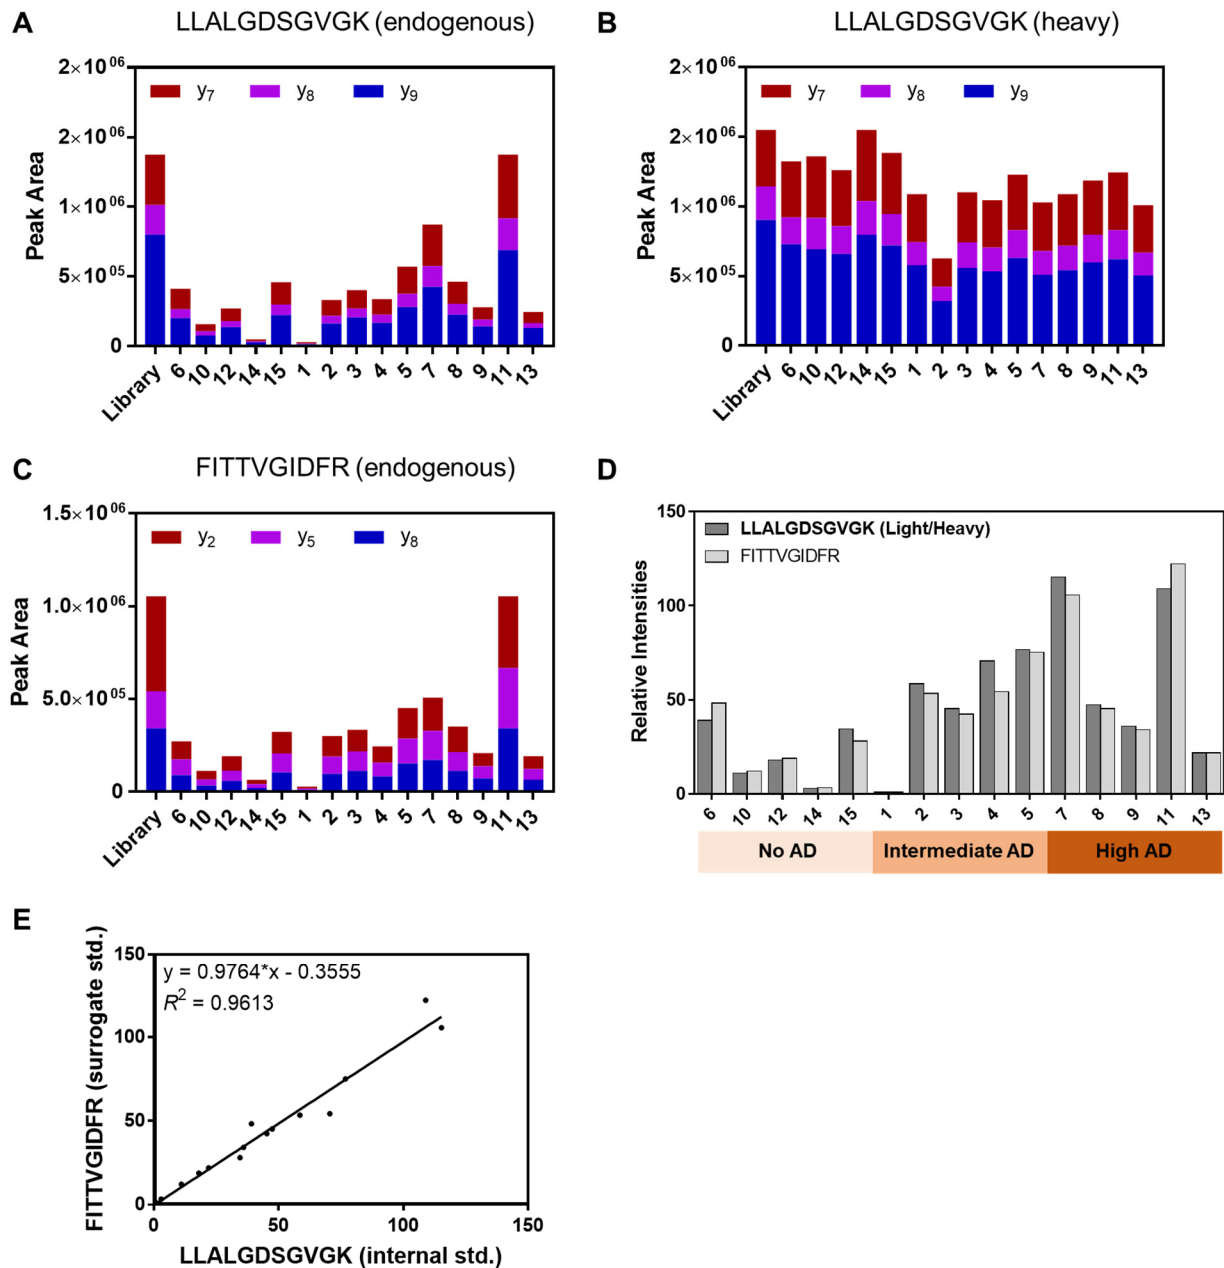

## References:

1. Pavlos, N. J.; Gronborg, M.; Riedel, D.; Chua, J. J.; Boyken, J.; Kloepper, T. H.; Urlaub, H.; Rizzoli, S. O.; Jahn, R., Quantitative analysis of synaptic vesicle Rabs uncovers distinct yet overlapping roles for Rab3a and Rab27b in Ca<sup>2+</sup>-triggered exocytosis. *J. Neurosci.* **2010**, *30*, 13441-53.
2. Kokotos, A. C.; Peltier, J.; Davenport, E. C.; Trost, M.; Cousin, M. A., Activity-dependent bulk endocytosis proteome reveals a key presynaptic role for the monomeric GTPase Rab11. *Proc. Natl. Acad. Sci. U. S. A.* **2018**, *115*, E10177-E10186.
3. Mignogna, M. L.; D'Adamo, P., Critical importance of RAB proteins for synaptic function. *Small GTPases* **2018**, *9*, 145-157.
